# Supplementary material for: Integrating Metabolomics and Gene Expression Underlying Potential Biomarkers Compounds Associated with Antioxidant Activity in Southern Grape Seeds
Source: MDPI journal article supplement (doi:10.3390/metabo13020210), 2023-01-31
Supplement: s1 [file s1]

**Table S1. Identified metabolites in C5, C6, and LF muscadine ripe berries.**

| NO | Compounds identified<br>in ESI+ mode | Compounds identified<br>in ESI- mode  | Compounds identified<br>in ESI- &ESI+ mode |
|----|--------------------------------------|---------------------------------------|--------------------------------------------|
| 1  | Trehalose 6-phosphate                | 16-Hydroxyhexadecanoic acid           | 12-Hydroxydodecanoic acid                  |
| 2  | 2,4,6-Octatriynoic acid              | 3,5-Digalloylepicatechin              | 2-Furoic acid                              |
| 3  | 2,5-Furandicarboxylic acid           | 3-Oxo-hexadecanoic acid               | 2-Methylbenzoic acid                       |
| 4  | 2-Deoxymugineic acid                 | 5-Methoxysalicylic acid               | 4-Acetamidobutanoic acid                   |
| 5  | 2-Furanmethanol                      | 6-Chlorocatechin                      | 4-Dodecylbenzenesulfonic Acid              |
| 6  | 2-Isopropyl citrate                  | 6-Epi-7-isocucurbit acid glucoside    | 4-Hydroxybenzaldehyde                      |
| 7  | 2-Methylnicotinate                   | 7-Methylxanthine                      | 4-Pyridoxic acid                           |
| 8  | 2-Methylcitric acid                  | Aesculin                              | Abscisic acid                              |
| 9  | 3-Hydroxycoumarin                    | Ascorbic acid                         | Aconitic acid                              |
| 10 | 3,4-Dihydroxymandelic acid           | Aucubin                               | Adipic acid                                |
| 11 | 3-O-p-Coumaroylquinic acid           | Azelaic acid                          | Arbutin                                    |
| 12 | 3-Oxododecanoic acid                 | beta-D-Glucose 6-phosphate            | Asiatic acid                               |
| 13 | 3-trans-p-Coumaroylrotundic acid     | Caryoptosidic acid                    | Astilbin                                   |
| 14 | 4-Guanidinobutanoic acid             | Cibacic acid                          | Caffeic acid                               |
| 15 | 4-Hydroxynonenal                     | Citramalic acid                       | Caffeoylmalic acid                         |
| 16 | 5-Aminolevulinic acid                | Citrinin                              | Catechin                                   |
| 17 | 5-Hydroxy-2-furoic acid              | Cyclodopa glucoside                   | Chlorogenic acid                           |
| 18 | 5-Hydroxyindoleacetic acid           | Delphinidin 3-lathyruside 5-glucoside | Cinnamic acid                              |
| 19 | 8,8-Methylenbiscatechin              | Delphinidin 3-sophoroside             | Citric acid                                |
| 20 | 9-Oxo-nonanoic acid                  | Deoxyribose                           | Cysteine                                   |
| 21 | Acetophenone                         | D-Glucuronic acid                     | Delphinidin 3-arabinoside                  |
| 22 | Acetylornithine                      | Diethylmalic acid                     | Deoxyinosine                               |
| 23 | Adenosine                            | Epiafzelechin 3-gallate               | Dicaffeoylquinic acid                      |
| 24 | Alanine                              | Epigallocatechin 3,5-di-gallate       | Ellagic acid                               |
| 25 | Amidosulfonic acid                   | Epigallocatechin gallate              | Epicatechin-3-gallate                      |
| 26 | Aminobutyric acid                    | Eujambolin                            | Epigallocatechin                           |
| 27 | Arecoline                            | Galactaric acid                       | Epigallocatechin 3-cinnamate               |
| 28 | Argininosuccinic acid                | Gentisic acid                         | Epigallocatechin 3-glucuronide             |
| 29 | Asparagine                           | Gluconic acid                         | Fertaric acid                              |
| 30 | Benzaldehyde                         | Glyceric acid                         | Ferulic acid                               |
| 31 | Benzophenone                         | Hesperidin                            | Fumaric acid                               |
| 32 | Caftaric acid                        | Hydroxypropionic acid                 | Galactose                                  |
| 33 | Capryloylglycine                     | Isolimoncic acid                      | Gallic acid                                |
| 34 | Carvone                              | Isowertin 2-rhamnoside                | Glucobrassicin                             |
| 35 | Citral                               | Kaempferol 3-xylosylglucoside         | Glutamine                                  |
| 36 | Coumapherine                         | Kaempferol 7-(6-galloylglucoside)     | Glutathione                                |
| 37 | Coumarin                             | L-Cystine                             | Glycyrrhetic acid                          |
| 38 | Cyclamic acid                        | Liquocoumarin                         | Guanosine                                  |
| 39 | Cyclohexylamine                      | Lucuminic acid                        | Isochloretin                               |
| 40 | Cytidine                             | Luteolin                              | Isochloretin                               |
| 41 | Daucic acid                          | Malonic acid                          | Isoferulic acid 3-O-glucuronide            |
| 42 | Diaminopimelic acid                  | Methyl acetate                        | Isolaricresinol 4-O-beta-D-glucoside       |
| 43 | Dihydroferulic acid                  | Methylsuccinic acid                   | Isorhamnetin 3-(6-malonylglucoside)        |
| 44 | Dihydrojasmonic acid                 | Naringin                              | Itaconic acid                              |
| 45 | Dihydromelilotoside                  | Neuraminic acid                       | Jasmonic acid                              |
| 46 | Dihydrosinapic acid                  | N-Undecylbenzenesulfonic acid         | Kaempferol 3-glucuronide                   |
| 47 | Dihydrotestosterone                  | Oxalacetic acid                       | L-Arginine                                 |
| 48 | Dihydrothymine                       | Oxalic acid                           | L-Aspartic acid                            |
| 49 | Dihydrouracil                        | Phenylacetaldehyde                    | Lepidimonic acid                           |
| 50 | Dopa                                 | p-Hydroxyphenylacetic acid            | L-Glutamic acid                            |
| 51 | Dopamine glucuronide                 | Piceid                                | L-Histidine                                |
| 52 | Eicosadienoic acid                   | Pimelic acid                          | Limocitrin 3-rutinoside                    |
| 53 | Eicosapentaenoic acid                | Pyruvic acid                          | Linamarin                                  |

|     |                           |                           |                                   |
|-----|---------------------------|---------------------------|-----------------------------------|
| 54  | Epidermin                 | Retinoic acid             | Linoleic acid                     |
| 55  | Epsilon-caprolactam       | Rhamnazin 3-rutinoside    | L-Leucine                         |
| 56  | Erucic acid               | S-Lactoylglutathione      | L-Phenylalanine                   |
| 57  | Erythrose                 | Stearic acid              | L-Quebrachitol                    |
| 58  | Ethyl lactate             | Suberic acid              | L-Threonine                       |
| 59  | Ethyl oleate              | Sucralose                 | L-Tyrosine                        |
| 60  | Folinic acid              | Tartaric acid             | Luteone                           |
| 61  | Fukiic acid               | Threonic acid             | Malic acid                        |
| 62  | Furaneol                  | Troloxerutin              | Medicagenic acid                  |
| 63  | gamma-Glutamylleucine     | Undecanedioic acid        | Mevalonic acid                    |
| 64  | Glucogallin               | Ureidopropionic acid      | Monobutylphthalate                |
| 65  | Glucosamine               | Uridine 5-diphosphate     | Myricetin                         |
| 66  | Glucose 1-phosphate       | Vanillic acid 4-O-sulfate | Myricetin 3-galactoside           |
| 67  | Glutaric acid             | Xanthylic acid            | Myrsinone                         |
| 68  | Glycerol 3-phosphate      |                           | N-Acetyl-L-glutamic acid          |
| 69  | Glycerophosphocholine     |                           | Naringenin                        |
| 70  | Guaiacol                  |                           | Neoglucobrassicin                 |
| 71  | Guanine                   |                           | N-Undecanoylglycine               |
| 72  | Heptanal                  |                           | Oleanolic acid                    |
| 73  | Hexanal                   |                           | Ornithine                         |
| 74  | Histamine                 |                           | Oxoadipic acid                    |
| 75  | Homomethionine            |                           | Oxoglutaric acid                  |
| 76  | Indole                    |                           | Pantothenic acid                  |
| 77  | Indole-3-carboxaldehyde   |                           | Phaseolic acid                    |
| 78  | Isobutyric acid           |                           | Phloretin                         |
| 79  | Isorhamnetin              |                           | Phosphate                         |
| 80  | Isovanillic acid          |                           | Phosphoenolpyruvic acid           |
| 81  | Kaempferol                |                           | Phthalic acid                     |
| 82  | Kojic acid                |                           | Piscidic acid                     |
| 83  | Kynurenic acid            |                           | Procyanidin B1                    |
| 84  | Lactosamine               |                           | Procyanidin C1                    |
| 85  | L-Agaritine               |                           | Protohypericin                    |
| 86  | Levulinic acid            |                           | Punicic acid                      |
| 87  | Linoleamide               |                           | Pyrocatechol                      |
| 88  | Linoleic acid             |                           | Pyroglutamic acid                 |
| 89  | Linoleoyl ethanolamide    |                           | Quercetin                         |
| 90  | L-Methionine              |                           | Quercetin 3-(6-malonyl-glucoside) |
| 91  | Lysine                    |                           | Quercetin 3-arabinoside           |
| 92  | Methionine sulfoxide      |                           | Quercetin 4-glucoside             |
| 93  | Methyl cinnamate          |                           | Quinic acid                       |
| 94  | Muramic acid              |                           | Rutin                             |
| 95  | N-Acetylneuraminic acid   |                           | Salicylic acid                    |
| 96  | N-Acetylserotonin         |                           | Scopoletin                        |
| 97  | N-Acetylvaline            |                           | Serine                            |
| 98  | Neocnidilide              |                           | Shikimic acid                     |
| 99  | N-Glycolylneuraminic acid |                           | Sinapic acid                      |
| 100 | Niacinamide               |                           | Succinic acid                     |
| 101 | Nicotinic acid            |                           | Syringic acid                     |
| 102 | N-Undecanoylglycine       |                           | Tocopheronic acid                 |
| 103 | Octadecanamide            |                           | Traumatic acid                    |
| 104 | Octadecylamine            |                           | Trehalose                         |
| 105 | Oleamide                  |                           | Trifolin                          |
| 106 | Oleoylethanolamide        |                           | Tryptophan                        |
| 107 | Olopatadine               |                           | Uridine                           |
| 108 | Palmitic amide            |                           |                                   |
| 109 | Palmitoleylethanolamde    |                           |                                   |

|     |                            |  |  |
|-----|----------------------------|--|--|
| 110 | Panthenol                  |  |  |
| 111 | Pantoyllactone glucoside   |  |  |
| 112 | p-Coumaric acid            |  |  |
| 113 | p-Cresol                   |  |  |
| 114 | p-Cymene                   |  |  |
| 115 | Pelargonidin 3-rhamnoside  |  |  |
| 116 | Penmacric acid             |  |  |
| 117 | Phenol                     |  |  |
| 118 | Phenylethylamine           |  |  |
| 119 | Phenylglyoxylic acid       |  |  |
| 120 | Phosphoglycolic acid       |  |  |
| 121 | Phosphohydroxypyruvic acid |  |  |
| 122 | Phytosphingosine           |  |  |
| 123 | Pipecolic acid             |  |  |
| 124 | Piperidine                 |  |  |
| 125 | Pirbuterol                 |  |  |
| 126 | Proanthocyanidin A2        |  |  |
| 127 | Proline                    |  |  |
| 128 | Prostaglandin B1           |  |  |
| 129 | protocatechuic acid        |  |  |
| 130 | Pubescenol                 |  |  |
| 131 | Pyridoxal                  |  |  |
| 132 | Pyruvic acid               |  |  |
| 133 | Quinolinic acid            |  |  |
| 134 | Quinone                    |  |  |
| 135 | Resveratrol                |  |  |
| 136 | Rhamnitol                  |  |  |
| 137 | Rutagravine                |  |  |
| 138 | Sebacic acid               |  |  |
| 139 | Spermidine                 |  |  |
| 140 | Sphinganine                |  |  |
| 141 | Sphingosine                |  |  |
| 142 | Stearidonic acid           |  |  |
| 143 | Styrene                    |  |  |
| 144 | Succinylacetone            |  |  |
| 145 | Targinine                  |  |  |
| 146 | Taurine                    |  |  |
| 147 | Theaflavic acid            |  |  |
| 148 | Thymine                    |  |  |
| 149 | Tiglic acid                |  |  |
| 150 | Tridecanoic acid           |  |  |
| 151 | Triethylamine              |  |  |
| 152 | Tyrosine methylester       |  |  |
| 153 | Tyrosol                    |  |  |
| 154 | Urocanic acid              |  |  |
| 155 | Valine                     |  |  |
| 156 | Valylproline               |  |  |
| 157 | Vanillin                   |  |  |
