# Supplementary material for: Integrating Metabolomics and Gene Expression Underlying Potential Biomarkers Compounds Associated with Antioxidant Activity in Southern Grape Seeds
Source: MDPI journal article supplement (doi:10.3390/metabo13020210), 2023-01-31
Supplement: s1 [file s1]

**Table S2.** The annotation and oligonucleotide primers of assessed genes by qPCR.

| Order | Gene ID              | Gene Annotation                                | Gene Abbreviation |
|-------|----------------------|------------------------------------------------|-------------------|
| 1     | evm.model.chr14.2977 | 3-dehydroquinate synthase                      | DHQS              |
| 2     | evm.model.chr14.559  | 3-dehydroquinate dehydratase                   | DHD               |
| 3     | evm.model.chr18.2392 | Shikimate kinase                               | SK                |
| 4     | evm.model.chr14.3086 | Chorismate mutase                              | CM                |
| 5     | evm.model.chr6.362   | Phenylalanine ammonia-lyase                    | PAL               |
| 6     | evm.model.chr14.2273 | Chalcone synthase                              | CHS               |
| 7     | evm.model.chr13.1853 | Cinnamoyl-CoA reductase                        | CCR               |
| 8     | evm.model.chr4.2404  | Cinnamyl alcohol dehydrogenase                 | CAD               |
| 9     | evm.model.chr17.1013 | Flavanone-3-hydroxylase                        | F3H               |
| 10    | evm.model.chr18.1438 | Dihydroflavonol 4-reductase                    | DFR               |
| 11    | evm.model.chr17.567  | Leucoanthocyanidin reductase                   | LAR               |
| 12    | evm.model.chr10.496  | Anthocyanidin reductase                        | ANR               |
| 13    | evm.model.chr13.1779 | gallate 1- $\beta$ -glucosyltransferase        | UGT               |
| 14    | evm.model.chr16.1632 | UDP-glucose: flavonoid 3-O-glucosyltransferase | UFGT              |
| 15    | evm.model.chr18.2304 | Laccase                                        | LAC               |
| 16    |                      | Elongation Factor 1                            | EF1               |
| 17    |                      | Actin                                          | Actin             |

| Primer_F             | Primer_R             |
|----------------------|----------------------|
| CTTCTTCGGTTACATCGGCG | AAGTGTTCCATCCCCTCTCG |
| AGGAACTTCAGTCCTGCACA | GCCTTCATACTGACCACCCT |
| GACGAGTGTCTTTGGGGATT | TCCCATCATTCCAACAAGAA |
| GCAGGCTCTGTCAAAGAGAA | CCGTAGGCTTTGGTTTTCAT |
| CATTGGGAAGCTCATGTTTG | GGCTAGGAATTGGAGCTCAG |
| GTTTTGGTCGTCTGCTCTGA | TCTGAGCTGCAGAGACGAGT |
| CGTCTATGTCTGCGGTGGA  | AACTTCCAAGCAGCCTCCT  |
| GGAGAATTACTGCCCCAAAA | CTGTGATCCCAGCACAGAGT |
| CATATCCGACAGGAGGAGGT | TCCACCACCATCTCTTTGAA |
| TCGGTTCATGGCTGGTCAT  | TGAGGCTTGGAGGCATTGA  |
| AACCGTGGAAGAAGATGACC | ACTGCATCTCCGGATAAAGG |
| CAGAAGGGCTATGCTGTCAA | GACAAAGTCGCAACCTGCTA |
| ACCTCGACCCCATCAAAGG  | TTCCGGGCCTTGAAGAAGT  |
| TGAAGCGCTTGAAATACCAG | CGGATCAACCACATCTTCTG |
| ATCGTCCTTGCATGTTGGTA | TGACGATGCGGAGAAGATAG |
| CACTACTGCTGAACGGGAAA | GGACTTCTGGACAACGGAAT |
| CACTACTGCTGAACGGGAAA | GGACTTCTGGACAACGGAAT |
